# Supplementary material
Source: PubMed Central journal article supplement (PMC4143176)
Supplement: np500370c_si_001.pdf [file np500370c_si_001.pdf]

# Supporting information for NRPquest: Coupling Mass-Spectrometry and Genome Mining for Non Ribosomal Peptide Discovery

---

Hosein Mohimani,<sup>†</sup> Wei-Ting Liu,<sup>‡</sup> Roland D. Kersten,<sup>§</sup> Bradley S. Moore,<sup>§,⊥</sup> Pieter C. Dorrestein,<sup>‡,⊥</sup> Pavel A. Pevzner,<sup>||,\*</sup>

<sup>†</sup>Department of Electrical and Computer Engineering, UC San Diego

<sup>‡</sup>Department of Chemistry and Biochemistry, UC San Diego

<sup>§</sup>Center for Marine Biotechnology and Biomedicine, Scripps Institution of Oceanography, UC San Diego

<sup>⊥</sup>Skaggs School of Pharmacy and Pharmaceutical Sciences, UC San Diego

<sup>||</sup> Department of Computer Science and Engineering, UC San Diego

**Table S1.** (A) Identifying individual spectra from *S. roseosporous* (SR), *S. pristinaespiralis* (SP), *B. subtilis* (BS), and *B. brevis* (BB) extracts. For the spectra that can be dereplicated from the Norine dataset with p-value less than  $10^{-10}$ , the corresponding peptide is shown. (B) Rescoring results of part (A) by spectral networks using multitag algorithm.<sup>13</sup> The gene clusters correspond to the known NRPs arylomycin, daptomycin, pristinamycin, surfactin, plipastatin, and tyrocidine, respectively. SpecNetScore is shown for each peptide. Brackets stand for cyclic/branched-cyclic structure, and superscripts stand for modification masses.(C) Correct structure of peptides produced by these organisms (only most abundant species is shown for each peptide family)

(A)

|    | mz                 | p-value             | structure            |                        |                    |                       |                       |      |                       |                     |                    |      |                       |     |      |
|----|--------------------|---------------------|----------------------|------------------------|--------------------|-----------------------|-----------------------|------|-----------------------|---------------------|--------------------|------|-----------------------|-----|------|
| SR | 1634 <sup>+1</sup> | 1*10 <sup>-12</sup> | [val <sup>+69</sup>  | trp                    | asn                | asp                   | thr]                  | gly  | orn                   | asp                 | ala                | asp  | gly                   | ser | me-g |
| SR | 1663 <sup>+1</sup> | 8*10 <sup>-11</sup> | [val                 | trp                    | asn                | asp                   | thr <sup>+79</sup>    | [gly | orn                   | asp                 | ala                | asp  | gly                   | ser | me-g |
| SR | 818 <sup>+2</sup>  | 9*10 <sup>-11</sup> | [val <sup>+92</sup>  | tyr                    | asn                | asp                   | thr                   | gly  | gln <sup>-38</sup>    | asp                 | val                | asp  | [gly                  | ser | me-g |
| SR | 976 <sup>+1</sup>  | 8*10 <sup>-13</sup> | [Me-Ser              | lyserg <sup>+196</sup> | gly <sup>+62</sup> | Me-hpg                | gly]                  |      | bht                   |                     |                    |      |                       |     |      |
| SR | 617 <sup>+1</sup>  | 2*10 <sup>-12</sup> | [Me-Ser              | gly                    | gly <sup>+94</sup> | Me-hpg <sup>-91</sup> | gly                   | tyr] |                       |                     |                    |      |                       |     |      |
| SR | 899 <sup>+1</sup>  | 2*10 <sup>-12</sup> | Me-Ser               | [gly                   | gly                | Me-hpg <sup>+94</sup> | gly]                  |      | tyr <sup>+172</sup> ] |                     |                    |      |                       |     |      |
| SP | 853 <sup>+1</sup>  | 2*10 <sup>-12</sup> | [ala                 | thr <sup>+32</sup>     | abu                | pro                   | Me-phe <sup>-82</sup> | pip  | phg]                  | dab                 |                    |      |                       |     |      |
| SP | 897 <sup>+1</sup>  | 1*10 <sup>-10</sup> | ile                  | thr                    | [val               | pro                   | Me-phe                | pip  | phg <sup>-61</sup>    | dab <sup>-2</sup> ] |                    |      |                       |     |      |
| SP | 867 <sup>+1</sup>  | 5*10 <sup>-10</sup> | [abu <sup>-10</sup>  | thr                    | ile                | pro                   | Me-phe <sup>-68</sup> | pip  | phg]                  | dab]                |                    |      |                       |     |      |
| BS | 1037 <sup>+1</sup> | 3*10 <sup>-16</sup> | [glu <sup>+222</sup> | leu                    | leu                | val                   | asp                   | leu  | leu <sup>+18</sup> ]  |                     |                    |      |                       |     |      |
| BS | 1023 <sup>+1</sup> | 7*10 <sup>-15</sup> | [glu <sup>+208</sup> | leu                    | leu                | val                   | asp                   | leu  | leu <sup>+18</sup> ]  |                     |                    |      |                       |     |      |
| BS | 760 <sup>+2</sup>  | 1*10 <sup>-16</sup> | [glu                 | orn                    | tyr                | thr                   | glu                   | val  | pro <sup>-1</sup>     | glu                 | tyr                | ile  | phe <sup>+135</sup> ] |     |      |
| BS | 738 <sup>+2</sup>  | 4*10 <sup>-15</sup> | [glu                 | orn                    | tyr                | thr                   | glu                   | val  | pro                   | glu <sup>-1</sup>   | tyr                | ile  | phe <sup>+91</sup> ]  |     |      |
| BS | 753 <sup>+2</sup>  | 1*10 <sup>-14</sup> | [glu                 | orn                    | tyr                | thr                   | glu                   | val  | pro <sup>-1</sup>     | glu                 | tyr                | ile  | phe <sup>+121</sup> ] |     |      |
| BB | 663 <sup>+2</sup>  | 8*10 <sup>-20</sup> | [phe                 | pro                    | phe <sup>+39</sup> | phe <sup>+39</sup>    | asn                   | gln  | tyr                   | val                 | orn <sup>+15</sup> | leu] |                       |     |      |
| BB | 1324 <sup>+1</sup> | 2*10 <sup>-18</sup> | phe                  | [pro                   | phe <sup>+39</sup> | phe <sup>+39</sup>    | asn                   | gln  | tyr                   | val                 | orn <sup>+14</sup> | leu] |                       |     |      |
| BB | 656 <sup>+2</sup>  | 3*10 <sup>-18</sup> | [phe                 | pro                    | phe <sup>+39</sup> | phe <sup>+39</sup>    | asn                   | gln  | tyr                   | val                 | orn                | leu] |                       |     |      |
| BB | 1285 <sup>+1</sup> | 5*10 <sup>-17</sup> | [phe <sup>-17</sup>  | pro                    | phe                | phe                   | asn                   | gln  | tyr                   | val                 | orn <sup>+31</sup> | leu] |                       |     |      |
| BB | 656 <sup>+2</sup>  | 1*10 <sup>-15</sup> | [phe                 | pro                    | phe <sup>+39</sup> | phe <sup>+39</sup>    | asn                   | gln  | tyr                   | val                 | orn <sup>+1</sup>  | leu] |                       |     |      |

(B)

| species | mz                 | score | sequence            |                        |                    |        |                       |      |                   |      |                    |      |                       |     |
|---------|--------------------|-------|---------------------|------------------------|--------------------|--------|-----------------------|------|-------------------|------|--------------------|------|-----------------------|-----|
| SR      | 1634 <sup>+1</sup> | 108   | [val <sup>+97</sup> | trp                    | asn                | asp    | [thr                  | gly  | orn               | asp  | ala                | asp  | gly                   | ser |
| SR      | 856 <sup>+1</sup>  | 142   | [Me-Ser             | lyserg <sup>+196</sup> | gly <sup>+62</sup> | Me-hpg | gly]                  | bht  |                   |      |                    |      |                       |     |
| SP      | 867 <sup>+1</sup>  | 314   | ala                 | thr <sup>+32</sup>     | [abu               | pro    | Me-phe <sup>-68</sup> | pip  | phg]              | dab] |                    |      |                       |     |
| BS      | 1037 <sup>+1</sup> | inf   | [glu <sup>+2</sup>  | leu <sup>+238</sup>    | leu                | val    | asp                   | leu] | leu               |      |                    |      |                       |     |
| BS      | 753 <sup>+2</sup>  | 75    | glu                 | orn                    | [tyr               | thr    | glu                   | val  | pro <sup>-1</sup> | glu  | tyr                | ile  | phe <sup>+121</sup> ] |     |
| BB      | 1324 <sup>+1</sup> | 349   | [phe                | pro                    | phe <sup>+39</sup> | phe    | asn                   | gln  | tyr               | val  | orn <sup>+14</sup> | leu] |                       |     |

(C)

|    |               |      |             |         |     |      |              |          |        |     |     |      |      |     |
|----|---------------|------|-------------|---------|-----|------|--------------|----------|--------|-----|-----|------|------|-----|
| SR | daptomycin    | 1664 | aC13:0      | trp     | asn | asp  | [thr         | gly      | orn    | asp | ala | asp  | gly  | ser |
| SR | arylomycin    | 853  | iC14:0      | Nme-ser | ala | gly  | [NMe-hpg     | ala      | tyr]   |     |     |      |      |     |
| SP | pristinamycin | 867  | hpa         | [thr    | abu | pro  | Nme-Me2A-phe | 4oxo-hpr | Ph-gly |     |     |      |      |     |
| BS | surfactin     | 1023 | [aC15:0-OH3 | glu     | leu | leu  | val          | asp      | leu    | leu |     |      |      |     |
| BS | plipastatin   | 1507 | C16:0-OH3   | glu     | orn | [tyr | athr         | glu      | val    | pro | glu | tyr  | ile] |     |
| BB | tyrocidine    | 1310 | [phe        | pro     | trp | phe  | asn          | gln      | tyr    | val | orn | leu] |      |     |

Table 2. (A) Spectral network dereplication results for top scoring networks of Table S1. These networks correspond to daptomycin (1), arylomycin (2), pristinamycin (3), surfactin (4), plipastatin (5) and tyrocidine (6) gene clusters respectively. For each network in Figure 3, all of the nodes are dereplicated from the most abundant known variant. Only variants with statistical significance smaller than 0.0001 are shown.

| Organism | mz                 | p-value            | reconstruction            |                        |                   |                   |                            |                        |                       |                    |                   |      |                   |     |        |      |  |  |
|----------|--------------------|--------------------|---------------------------|------------------------|-------------------|-------------------|----------------------------|------------------------|-----------------------|--------------------|-------------------|------|-------------------|-----|--------|------|--|--|
| SR       | 1664 <sup>+1</sup> | 2*10 <sup>9</sup>  | ac13:0                    | trp                    | asn               | asp               | [thr                       | gly                    | orn                   | asp                | ala               | asp  | gly               | ser | me-glu | kyn] |  |  |
| SR       | 819 <sup>-2</sup>  | 1*10 <sup>8</sup>  | ac13:0 <sup>28</sup>      | trp                    | asn               | asp               | [thr                       | gly                    | orn                   | asp                | ala               | asp  | gly               | ser | me-glu | kyn] |  |  |
| SR       | 1635 <sup>+1</sup> | 8*10 <sup>7</sup>  | ac13:0 <sup>28</sup>      | trp                    | asn               | asp               | [thr                       | gly                    | orn                   | asp                | ala               | asp  | gly               | ser | me-glu | kyn] |  |  |
| SR       | 1650 <sup>-1</sup> | 2*10 <sup>7</sup>  | ac13:0 <sup>14</sup>      | trp                    | asn               | asp               | [thr                       | gly                    | orn                   | asp                | ala               | asp  | gly               | ser | me-glu | kyn] |  |  |
| SR       | 832 <sup>-2</sup>  | 1*10 <sup>5</sup>  | ac13:0                    | trp                    | asn               | asp               | [thr                       | gly                    | orn                   | asp                | ala               | asp  | gly               | ser | me-glu | kyn] |  |  |
| SR       | 826 <sup>-2</sup>  | 1*10 <sup>5</sup>  | ac13:0 <sup>14</sup>      | trp                    | asn               | asp               | [thr                       | gly                    | orn                   | asp                | ala               | asp  | gly               | ser | me-glu | kyn] |  |  |
| SR       | 841 <sup>-2</sup>  | 1*10 <sup>5</sup>  | ac13:0                    | trp                    | asn <sup>19</sup> | asp               | [thr                       | gly                    | orn                   | asp                | ala               | asp  | gly               | ser | me-glu | kyn] |  |  |
| SR       | 1281 <sup>+1</sup> | 1*10 <sup>5</sup>  |                           |                        |                   | asp               | [thr                       | gly                    | orn                   | asp                | ala               | asp  | gly               | ser | me-glu | kyn] |  |  |
| SR       | 853 <sup>+1</sup>  | 9*10 <sup>10</sup> | ic14:0                    | N-Me-Ser               | ala               | gly               | [NMe-hpg                   | ala                    | tyr]                  |                    |                   |      |                   |     |        |      |  |  |
| SR       | 825 <sup>+1</sup>  | 5*10 <sup>10</sup> | ic14:0 <sup>42</sup>      | N-Me-Ser <sup>14</sup> | ala               | gly               | [NMe-hpg                   | ala                    | tyr]                  |                    |                   |      |                   |     |        |      |  |  |
| SR       | 839 <sup>-1</sup>  | 2*10 <sup>8</sup>  | ic14:0                    | N-Me-Ser               | ala               | gly               | [NMe-hpg                   | ala                    | tyr]                  |                    |                   |      |                   |     |        |      |  |  |
| SR       | 845 <sup>-1</sup>  | 5*10 <sup>7</sup>  | ic14:0 <sup>6</sup>       | N-Me-Ser               | ala               | gly               | [NMe-hpg                   | ala                    | tyr]                  |                    |                   |      |                   |     |        |      |  |  |
| SR       | 867 <sup>-1</sup>  | 4*10 <sup>5</sup>  | ic14:0 <sup>14</sup>      | N-Me-Ser               | ala               | gly               | [NMe-hpg                   | ala                    | tyr]                  |                    |                   |      |                   |     |        |      |  |  |
| SP       | 853 <sup>+1</sup>  | 7*10 <sup>14</sup> | hpa                       | [thr                   | abu               | pro               | NMe-Me2A-phe <sup>14</sup> | 4oxo-hpr               | Ph-gly]               |                    |                   |      |                   |     |        |      |  |  |
| SP       | 867 <sup>-1</sup>  | 3*10 <sup>11</sup> | hpa                       | [thr                   | abu               | pro               | NMe-Me2A-phe               | 4oxo-hpr               | Ph-gly]               |                    |                   |      |                   |     |        |      |  |  |
| SP       | 810 <sup>-1</sup>  | 3*10 <sup>9</sup>  | hpa                       | [thr <sup>14</sup>     | abu               | pro               | NMe-Me2A-phe <sup>43</sup> | 4oxo-hpr               | Ph-gly]               |                    |                   |      |                   |     |        |      |  |  |
| SP       | 857 <sup>-1</sup>  | 8*10 <sup>8</sup>  | hpa                       | [thr                   | abu               | pro               | NMe-Me2A-phe               | 4oxo-hpr <sup>10</sup> | Ph-gly]               |                    |                   |      |                   |     |        |      |  |  |
| SP       | 905 <sup>-1</sup>  | 3*10 <sup>7</sup>  | hpa                       | [thr                   | abu               | pro <sup>28</sup> | NMe-Me2A-phe               | 4oxo-hpr               | Ph-gly]               |                    |                   |      |                   |     |        |      |  |  |
| SP       | 883 <sup>-1</sup>  | 5*10 <sup>7</sup>  | hpa                       | [thr                   | abu               | pro               | NMe-Me2A-phe <sup>16</sup> | 4oxo-hpr               | Ph-gly]               |                    |                   |      |                   |     |        |      |  |  |
| SP       | 825 <sup>+1</sup>  | 2*10 <sup>6</sup>  | hpa                       | [thr                   | abu               | pro               | NMe-Me2A-phe <sup>43</sup> | 4oxo-hpr               | Ph-gly]               |                    |                   |      |                   |     |        |      |  |  |
| SP       | 891 <sup>+1</sup>  | 2*10 <sup>6</sup>  | hpa                       | [thr                   | abu               | pro <sup>22</sup> | NMe-Me2A-phe <sup>1</sup>  | 4oxo-hpr               | Ph-gly]               |                    |                   |      |                   |     |        |      |  |  |
| SP       | 889 <sup>-1</sup>  | 4*10 <sup>6</sup>  | hpa                       | [thr                   | abu               | pro <sup>22</sup> | NMe-Me2A-phe               | 4oxo-hpr               | Ph-gly]               |                    |                   |      |                   |     |        |      |  |  |
| SP       | 881 <sup>-1</sup>  | 7*10 <sup>6</sup>  | hpa                       | [thr                   | abu <sup>18</sup> | pro               | NMe-Me2A-phe               | 4oxo-hpr <sup>33</sup> | Ph-gly]               |                    |                   |      |                   |     |        |      |  |  |
| SP       | 899 <sup>-1</sup>  | 1*10 <sup>5</sup>  | hpa                       | [thr                   | abu               | pro               | NMe-Me2A-phe <sup>16</sup> | 4oxo-hpr               | Ph-gly <sup>16]</sup> |                    |                   |      |                   |     |        |      |  |  |
| SP       | 849 <sup>-1</sup>  | 1*10 <sup>5</sup>  | hpa                       | [thr                   | abu <sup>18</sup> | pro               | NMe-Me2A-phe               | 4oxo-hpr               | Ph-gly]               |                    |                   |      |                   |     |        |      |  |  |
| SP       | 875 <sup>+1</sup>  | 2*10 <sup>5</sup>  | hpa                       | [thr                   | abu               | pro <sup>8</sup>  | NMe-Me2A-phe               | 4oxo-hpr               | Ph-gly]               |                    |                   |      |                   |     |        |      |  |  |
| SP       | 847 <sup>-1</sup>  | 3*10 <sup>5</sup>  | hpa                       | [thr                   | abu <sup>18</sup> | pro               | NMe-Me2A-phe               | 4oxo-hpr               | Ph-gly <sup>1</sup>   |                    |                   |      |                   |     |        |      |  |  |
| SP       | 843 <sup>-1</sup>  | 3*10 <sup>5</sup>  | hpa                       | [thr                   | abu               | pro               | NMe-Me2A-phe               | 4oxo-hpr <sup>24</sup> | Ph-gly]               |                    |                   |      |                   |     |        |      |  |  |
| SP       | 873 <sup>-1</sup>  | 4*10 <sup>5</sup>  | hpa                       | [thr                   | abu               | pro               | NMe-Me2A-phe <sup>16</sup> | 4oxo-hpr <sup>10</sup> | Ph-gly]               |                    |                   |      |                   |     |        |      |  |  |
| BS       | 1041 <sup>+1</sup> | 2*10 <sup>11</sup> | [aC15:0-OH3               | glu                    | leu               | leu               | val                        | asp                    | leu <sup>-2</sup>     | leu <sup>16]</sup> |                   |      |                   |     |        |      |  |  |
| BS       | 1023 <sup>+1</sup> | 2*10 <sup>10</sup> | [aC15:0-OH3               | glu                    | leu               | leu               | val                        | asp                    | leu                   | leu]               |                   |      |                   |     |        |      |  |  |
| BS       | 1051 <sup>+1</sup> | 4*10 <sup>10</sup> | [aC15:0-OH3               | glu <sup>14</sup>      | leu               | leu               | val                        | asp                    | leu <sup>-15</sup>    | leu]               |                   |      |                   |     |        |      |  |  |
| BS       | 1009 <sup>-1</sup> | 2*10 <sup>9</sup>  | [aC15:0-OH3               | glu <sup>10</sup>      | leu               | leu               | val                        | asp                    | leu                   | leu <sup>3]</sup>  |                   |      |                   |     |        |      |  |  |
| BS       | 955 <sup>-1</sup>  | 6*10 <sup>8</sup>  | [aC15:0-OH3               | glu <sup>14</sup>      | leu               | leu               | val                        | asp                    | leu <sup>-13</sup>    | leu]               |                   |      |                   |     |        |      |  |  |
| BS       | 1019 <sup>+1</sup> | 7*10 <sup>8</sup>  | [aC15:0-OH3               | glu                    | leu <sup>18</sup> | leu               | val                        | asp                    | leu <sup>-15</sup>    | leu]               |                   |      |                   |     |        |      |  |  |
| BS       | 1037 <sup>+1</sup> | 2*10 <sup>7</sup>  | [aC15:0-OH3               | glu                    | leu               | leu               | val                        | asp                    | leu                   | leu <sup>14]</sup> |                   |      |                   |     |        |      |  |  |
| BS       | 1065 <sup>-1</sup> | 2*10 <sup>7</sup>  | [aC15:0-OH3               | glu <sup>28</sup>      | leu               | leu               | val                        | asp                    | leu <sup>-15</sup>    | leu]               |                   |      |                   |     |        |      |  |  |
| BS       | 1059 <sup>+1</sup> | 7*10 <sup>5</sup>  | [aC15:0-OH3               | glu                    | leu               | leu               | val <sup>23</sup>          | asp                    | leu                   | leu <sup>14]</sup> |                   |      |                   |     |        |      |  |  |
| BS       | 1071 <sup>+1</sup> | 7*10 <sup>5</sup>  | [aC15:0-OH3               | glu                    | leu               | leu <sup>35</sup> | val                        | asp                    | leu                   | leu <sup>14]</sup> |                   |      |                   |     |        |      |  |  |
| BS       | 1031 <sup>+1</sup> | 9*10 <sup>5</sup>  | [aC15:0-OH3 <sup>22</sup> | glu                    | leu               | leu               | val                        | asp                    | leu <sup>-13</sup>    | leu]               |                   |      |                   |     |        |      |  |  |
| BS       | 753 <sup>-2</sup>  | 4*10 <sup>11</sup> | C16:0-OH3 <sup>14</sup>   | glu                    | orn               | [tyr              | athr                       | glu                    | val                   | pro                | glu               | tyr  | ile               |     |        |      |  |  |
| BS       | 739 <sup>-2</sup>  | 2*10 <sup>10</sup> | C16:0-OH3 <sup>12</sup>   | glu                    | orn               | [tyr              | athr                       | glu                    | val                   | pro <sup>29</sup>  | glu               | tyr  | ile               |     |        |      |  |  |
| BS       | 732 <sup>-2</sup>  | 3*10 <sup>10</sup> | C16:0-OH3                 | glu                    | orn               | [tyr              | athr                       | glu                    | val <sup>29</sup>     | pro                | glu               | tyr  | ile               |     |        |      |  |  |
| BS       | 1507 <sup>-1</sup> | 4*10 <sup>9</sup>  | C16:0-OH3 <sup>14</sup>   | glu                    | orn               | [tyr              | athr                       | glu                    | val                   | pro                | glu               | tyr  | ile               |     |        |      |  |  |
| BS       | 760 <sup>-2</sup>  | 1*10 <sup>8</sup>  | C16:0-OH3 <sup>28</sup>   | glu                    | orn               | [tyr              | athr                       | glu                    | val                   | pro                | glu               | tyr  | ile               |     |        |      |  |  |
| BS       | 746 <sup>-2</sup>  | 2*10 <sup>8</sup>  | C16:0-OH3                 | glu                    | orn               | [tyr              | athr                       | glu                    | val                   | pro                | glu               | tyr  | ile               |     |        |      |  |  |
| BS       | 1535 <sup>-1</sup> | 1*10 <sup>5</sup>  | C16:0-OH3 <sup>41</sup>   | glu                    | orn               | [tyr              | athr                       | glu                    | val                   | pro                | glu               | tyr  | ile               |     |        |      |  |  |
| BS       | 724 <sup>-2</sup>  | 1*10 <sup>5</sup>  | C16:0-OH3 <sup>16</sup>   | glu                    | orn               | [tyr              | athr <sup>28</sup>         | glu                    | val                   | pro                | glu               | tyr  | ile               |     |        |      |  |  |
| BS       | 1525 <sup>+1</sup> | 2*10 <sup>5</sup>  | C16:0-OH3 <sup>14</sup>   | glu                    | orn               | [tyr              | athr                       | glu                    | val                   | pro                | glu               | tyr  | ile <sup>18</sup> |     |        |      |  |  |
| BB       | 675 <sup>-2</sup>  | 3*10 <sup>22</sup> | [phe                      | pro                    | trp               | phe <sup>40</sup> | asn                        | gln                    | tyr                   | val                | orn               | leu] |                   |     |        |      |  |  |
| BB       | 656 <sup>-2</sup>  | 3*10 <sup>20</sup> | [phe                      | pro                    | trp               | phe               | asn                        | gln                    | tyr                   | val                | orn               | leu] |                   |     |        |      |  |  |
| BB       | 663 <sup>-2</sup>  | 2*10 <sup>16</sup> | [phe                      | pro                    | trp               | phe               | asn                        | gln                    | tyr                   | val                | orn <sup>15</sup> | leu] |                   |     |        |      |  |  |
| BB       | 1324 <sup>+1</sup> | 5*10 <sup>16</sup> | [phe                      | pro                    | trp               | phe               | asn                        | gln                    | tyr                   | val                | orn <sup>15</sup> | leu] |                   |     |        |      |  |  |
| BB       | 1363 <sup>+1</sup> | 6*10 <sup>15</sup> | [phe                      | pro                    | trp               | phe <sup>39</sup> | asn                        | gln                    | tyr                   | val                | orn <sup>15</sup> | leu] |                   |     |        |      |  |  |
| BB       | 682 <sup>-2</sup>  | 2*10 <sup>14</sup> | [phe                      | pro                    | trp               | phe <sup>40</sup> | asn                        | gln                    | tyr                   | val                | orn <sup>14</sup> | leu] |                   |     |        |      |  |  |
| BB       | 667 <sup>-2</sup>  | 2*10 <sup>12</sup> | [phe                      | pro                    | trp               | phe <sup>24</sup> | asn                        | gln                    | tyr                   | val                | orn               | leu] |                   |     |        |      |  |  |
| BB       | 1285 <sup>+1</sup> | 3*10 <sup>12</sup> | [phe                      | pro                    | trp               | phe <sup>38</sup> | asn                        | gln                    | tyr                   | val                | orn <sup>14</sup> | leu] |                   |     |        |      |  |  |
| BB       | 1349 <sup>+1</sup> | 3*10 <sup>12</sup> | [phe                      | pro                    | trp               | phe <sup>40</sup> | asn                        | gln                    | tyr                   | val                | orn               | leu] |                   |     |        |      |  |  |
| BB       | 1372 <sup>+1</sup> | 1*10 <sup>10</sup> | [phe                      | pro                    | trp               | phe <sup>40</sup> | asn                        | gln                    | tyr <sup>23</sup>     | val                | orn               | leu] |                   |     |        |      |  |  |
| BB       | 1310 <sup>+1</sup> | 1*10 <sup>10</sup> | [phe                      | pro                    | trp               | phe               | asn                        | gln                    | tyr                   | val                | orn               | leu] |                   |     |        |      |  |  |
| BB       | 1295 <sup>+1</sup> | 7*10 <sup>10</sup> | [phe                      | pro                    | trp               | phe               | asn <sup>15</sup>          | gln                    | tyr                   | val                | orn               | leu] |                   |     |        |      |  |  |
| BB       | 691 <sup>-2</sup>  | 1*10 <sup>9</sup>  | [phe                      | pro                    | trp               | phe <sup>40</sup> | asn                        | gln                    | tyr                   | val                | orn <sup>33</sup> | leu] |                   |     |        |      |  |  |
| BB       | 1271 <sup>+1</sup> | 8*10 <sup>9</sup>  | [phe                      | pro                    | trp               | phe               | asn <sup>38</sup>          | gln                    | tyr                   | val                | orn               | leu] |                   |     |        |      |  |  |
| BB       | 1339 <sup>+1</sup> | 2*10 <sup>8</sup>  | [phe                      | pro                    | trp               | phe               | asn                        | gln                    | tyr                   | val <sup>15</sup>  | orn <sup>15</sup> | leu] |                   |     |        |      |  |  |
| BB       | 669 <sup>-2</sup>  | 2*10 <sup>8</sup>  | [phe                      | pro                    | trp               | phe <sup>40</sup> | asn <sup>13</sup>          | gln                    | tyr                   | val                | orn               | leu] |                   |     |        |      |  |  |
| BB       | 672 <sup>-2</sup>  | 1*10 <sup>6</sup>  | [phe                      | pro                    | trp               | phe               | asn                        | gln                    | tyr                   | val <sup>33</sup>  | orn               | leu] |                   |     |        |      |  |  |

## NRPquest webservice user manual guide

NRPquest webservice is available at [cyclo.ucsd.edu](http://cyclo.ucsd.edu). The user can upload their genomic and mass spectral datasets, and the webservice reports all the significant hits between the spectral dataset and NRPs predicted from the genomic datasets. Samples of datasets used in this paper from bacterial strains *Streptomyces roseosporus* NRRL 15998, *Streptomyces pristinaespiralis* ATCC 25486, *Bacillus subtilis* subsp. *subtilis* str. NCIB 3610, and *Bacillus brevis* ATCC 8185 are provided. The runtime is about 1 min/spectrum. **Fig. S1** shows a snapshot of how the webservice works for *Bacillus subtilis* str. NCIB 3610 dataset.

# NRPquest

|                                       |                                                        |                                                                    |
|---------------------------------------|--------------------------------------------------------|--------------------------------------------------------------------|
| mzXML File:                           | <input type="button" value="Choose File"/> PY79.mzXML  |                                                                    |
| Genome File:                          | <input type="button" value="Choose File"/> 11379.fasta | <input checked="" type="radio"/> protein <input type="radio"/> DNA |
| Email:                                | <input type="text" value="g.hosein.mohimani@g"/>       |                                                                    |
| Charge(default 1-3):                  | <input type="text"/>                                   |                                                                    |
| Precursor Tolerance (Th):             | <input type="text"/>                                   |                                                                    |
| Product Ion Tolerance (Th):           | <input type="text"/>                                   |                                                                    |
| Spectral network                      | <input type="checkbox"/>                               |                                                                    |
| <input type="button" value="Submit"/> |                                                        |                                                                    |

[Sample spectral datasets and documentation](#)

(a)

| Scan Index | Spectrum Mass | Charge | Genome cluster      | Score | Hmm Pvalue | Structure     | Peptide                                                                              |
|------------|---------------|--------|---------------------|-------|------------|---------------|--------------------------------------------------------------------------------------|
| 2622       | 1008.69       | 1      | 378344 ... 400366   | 16.00 | 1.55e-10   | branch-cyclic | D_glu(+242.121);D_leu(-29.9146);[D_leu;D_val;asp;D_leu;leu]                          |
| 2823       | 1036.71       | 1      | 378344 ... 400366   | 12.00 | 3.28e-10   | branch-cyclic | D_glu(+240.12);D_leu;D_leu;D_val;asp;[D_leu;leu]                                     |
| 2901       | 1022.70       | 1      | 378344 ... 400366   | 19.00 | 1.57e-09   | branch-cyclic | D_glu(+222.111);[D_leu;D_leu;D_val;asp;D_leu;leu(+4.10442)]                          |
| 707        | 1074.84       | 1      | 378344 ... 400366   | 12.00 | 2.22e-09   | branch-cyclic | [D_gln;D_leu(+220.11);D_leu;D_val(+59.2339);asp;D_leu;leu]                           |
| 2669       | 1036.70       | 1      | 378344 ... 400366   | 13.00 | 3.15e-09   | branch-cyclic | [D_glu(+258.129);D_leu;D_leu;D_val];asp(-17.9058);D_leu;leu]                         |
| 2795       | 1008.68       | 1      | 378344 ... 400366   | 11.00 | 1.09e-08   | linear        | D_gln(+227.114);D_leu;D_leu;D_val;asp(-31.9387);D_leu;leu]                           |
| 2979       | 1036.72       | 1      | 378344 ... 400366   | 19.00 | 1.68e-08   | cyclic        | [D_glu(+222.111);D_leu;D_leu;D_val;asp;D_leu;leu(+18.125)]                           |
| 2851       | 1036.71       | 1      | 378344 ... 400366   | 9.00  | 5.53e-08   | branch-cyclic | D_gln(+286.143);D_leu(-44.9331);D_leu;D_val;asp;[D_leu;leu]                          |
| 3591       | 1077.93       | 1      | 378344 ... 400366   | 12.00 | 1.19e-07   | branch-cyclic | D_gln;[D_leu;D_leu(+199.1);D_val;asp;D_leu(+83.3377);leu]                            |
| 3116       | 882.64        | 1      | 378344 ... 400366   | 11.00 | 1.50e-07   | branch-cyclic | [D_gln(-45.9216);D_leu;D_leu(+133.067);D_val;asp;]D_leu;leu]                         |
| 3747       | 769.55        | 2      | 1994855 ... 1954732 | 10.00 | 4.84e-07   | branch-cyclic | glu;D_D_orn;tyr;D_thr(+34.3715);D_glu;D_val;D_pro;[D_glu;D_D_tyr;ile(+118.059);phe]  |
| 3751       | 893.63        | 1      | 378344 ... 400366   | 11.00 | 6.03e-07   | branch-cyclic | D_gln;D_leu(+140.07);[D_leu;D_val;asp;D_leu;leu(-41.9335)]                           |
| 937        | 815.73        | 1      | 378344 ... 400366   | 11.00 | 6.50e-07   | branch-cyclic | D_glu;D_leu;[D_leu;D_val(-32.7805);asp;D_leu(+52.026);leu]                           |
| 319        | 621.26        | 2      | 1994855 ... 1954732 | 23.00 | 6.92e-07   | branch-cyclic | [glu;D_D_orn(-53.0265);tyr;D_thr;D_glu;D_val;D_pro;D_glu;D_D_tyr(-91.1162)];ile;phe] |
| 1638       | 757.49        | 1      | 378344 ... 400366   | 11.00 | 1.00e-06   | branch-cyclic | [D_gln;D_leu(-13.0065);D_leu(-25.0027);D_val;asp;]D_leu;leu]                         |
| 1674       | 879.49        | 1      | 378344 ... 400366   | 11.00 | 1.13e-06   | branch-cyclic | [D_glu;D_leu;D_leu(+49.0245);D_val;asp;]D_leu;leu(+33.9864)                          |
| 2751       | 849.50        | 1      | 378344 ... 400366   | 9.00  | 1.16e-06   | branch-cyclic | [D_glu;D_leu(+56.028);D_leu;D_val];asp;D_leu;leu(-3.01043)                           |
| 3830       | 931.60        | 1      | 378344 ... 400366   | 10.00 | 1.26e-06   | branch-cyclic | D_glu;D_leu;[D_leu;D_val(+15.0608);asp(+120.06);D_leu;leu]                           |
| 329        | 407.23        | 2      | 378344 ... 400366   | 15.00 | 1.40e-06   | branch-cyclic | [D_glu;D_leu(-31.0578);D_leu;D_val(+48.024);asp;D_leu;leu]                           |
| 412        | 472.31        | 3      | 1994855 ... 1954732 | 26.00 | 1.48e-06   | branch-cyclic | [glu(+96.048);D_D_orn;tyr(-66.7867);D_thr;D_glu;D_val;D_pro;D_glu;D_D_tyr;ile];phe]  |
| 520        | 805.75        | 1      | 378344 ... 400366   | 10.00 | 1.53e-06   | branch-cyclic | [D_glu(+26.013);D_leu;D_leu;D_val;asp;]D_leu(-16.744);leu]                           |
| 226        | 424.15        | 2      | 378344 ... 400366   | 14.00 | 1.78e-06   | branch-cyclic | D_gln;D_leu(-11.2287);[D_leu;D_val;asp(+63.0315);D_leu;leu]                          |
| 1751       | 951.64        | 1      | 378344 ... 400366   | 12.00 | 1.80e-06   | branch-cyclic | [D_glu;D_leu;D_leu;D_val(+67.1184);asp;D_leu(+88.044)];leu]                          |
| 3382       | 868.61        | 1      | 378344 ... 400366   | 7.00  | 1.83e-06   | branch-cyclic | [D_gln;D_leu(+20.0877)];D_leu;D_val;asp;D_leu(+53.0265);leu]                         |
| 3049       | 936.78        | 1      | 378344 ... 400366   | 9.00  | 2.14e-06   | branch-cyclic | D_glu(+96.048);D_leu;D_leu;D_val;[asp;D_leu;leu(+44.2528)]                           |
| 1683       | 480.32        | 2      | 378344 ... 400366   | 16.00 | 2.17e-06   | branch-cyclic | [D_gln(+204.102);D_leu(-39.9648);D_leu;D_val;asp;D_leu;leu]                          |

(b)

Fig. S1 NRPquest webserver (a) and results for *Bacillus subtilis* (b). The top hits with masses 1008, 1022, 1036 and 1074 represent surfactins.

The whole analysis takes about an hour. The webserver and datasets are available at [cyclo.ucsd.edu](http://cyclo.ucsd.edu).

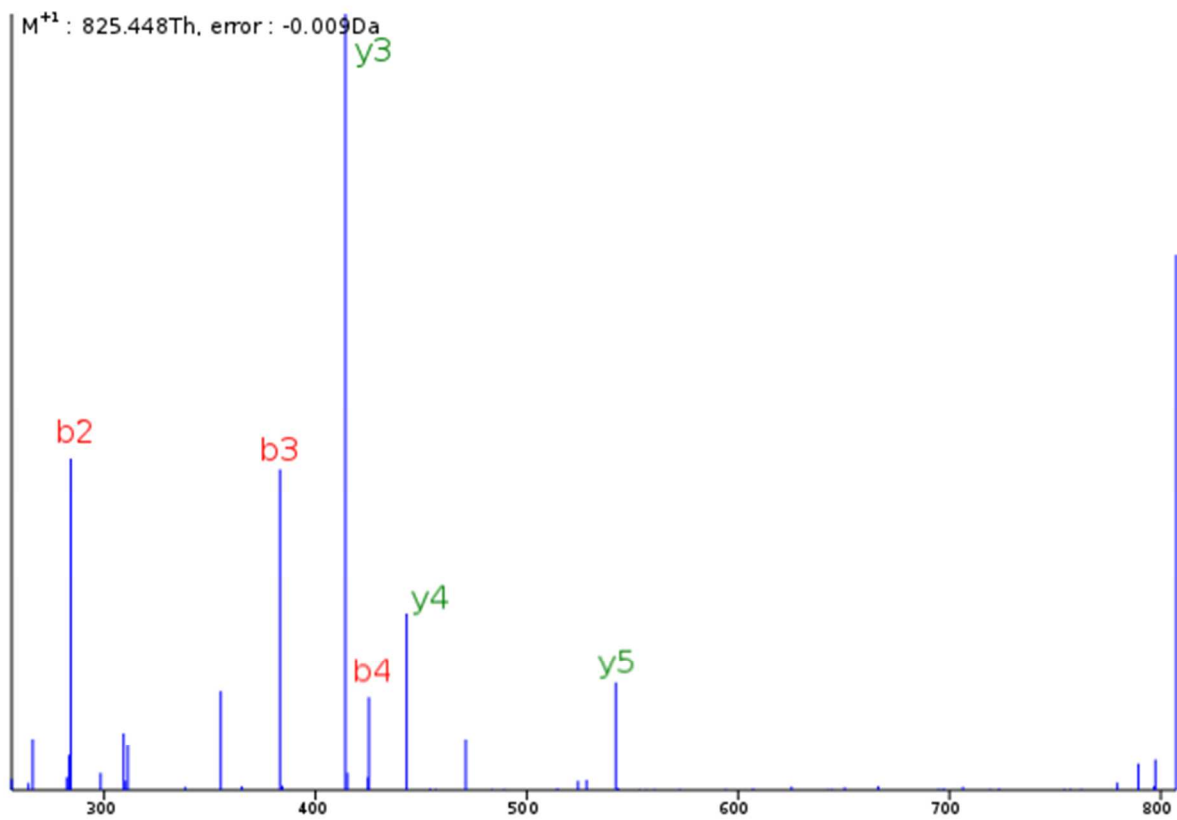

(a)

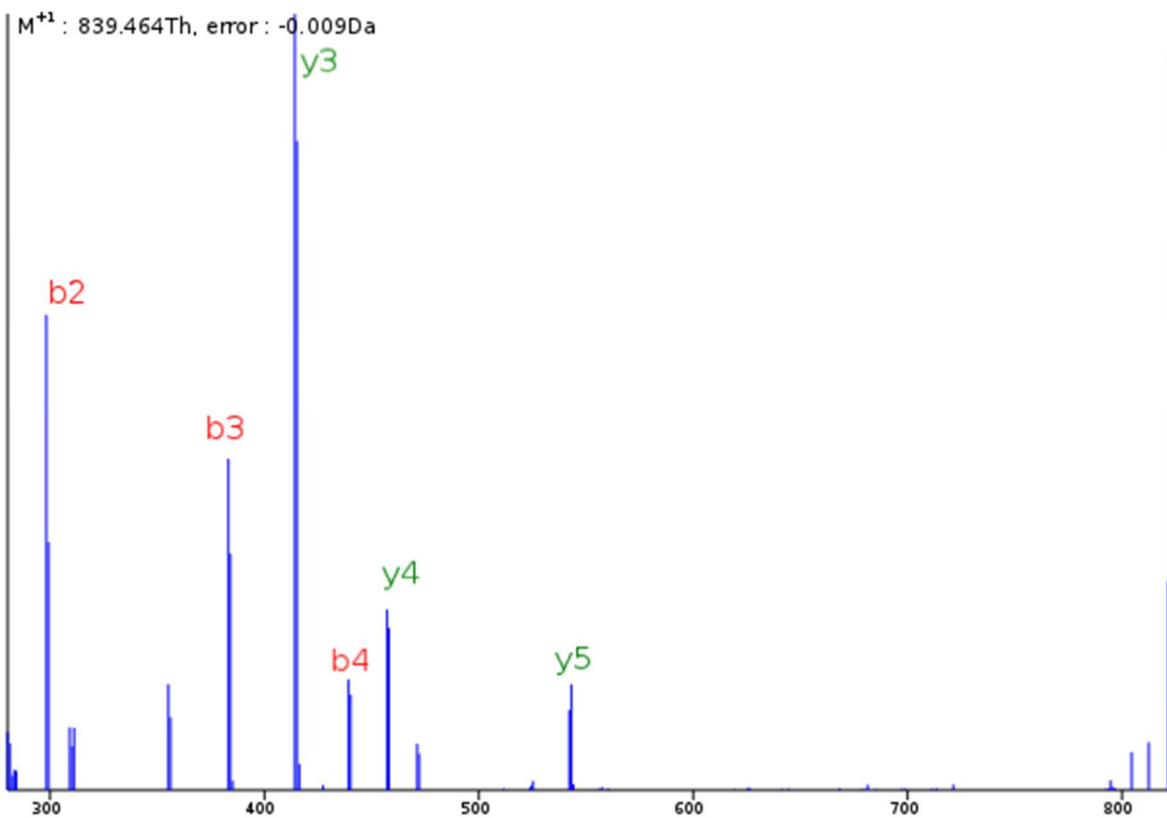

(b)

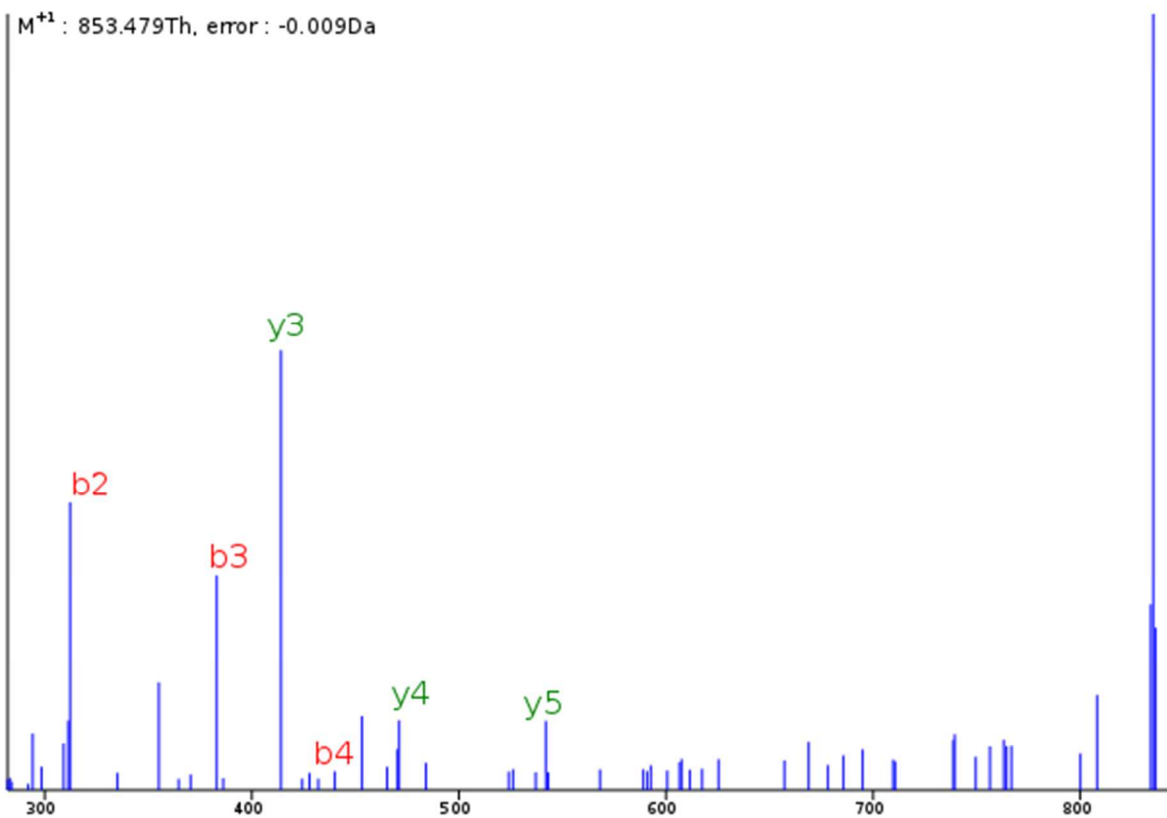

(c)

Fig. S2 Annotation of the spectra of (a) arylomycin A2, (b) arylomycin A4 and (c) arylomycin A5
